# Supplementary material for: Increasing Environmental Health Literacy through Contextual Learning in Communities at Risk
Source: Int J Environ Res Public Health. 2018 Oct 9;15(10):2203. doi: 10.3390/ijerph15102203 (PMC6210322; doi:10.3390/ijerph15102203)
Supplement: Supplementary file 1 [file ijerph-15-02203-s001.zip]

Archive with 6 entries (6 files):
- S1_RecruitmentDeweyHumboldtEnglish.pdf
- S1_RecruitmentTucsonSpanish.pdf
- S2_Training Agendas.pdf
- S3_PreProgramSurvey.pdf
- S4_ContentSurveyPrePost.pdf
- S5_PostProgramSurvey.pdf
