# Supplementary material for: Increasing Environmental Health Literacy through Contextual Learning in Communities at Risk
Source: Int J Environ Res Public Health. 2018 Oct 9;15(10):2203. doi: 10.3390/ijerph15102203 (PMC6210322; doi:10.3390/ijerph15102203)
Supplement: Supplementary file 1 [file ijerph-15-02203-s001.zip › S1_RecruitmentDeweyHumboldtEnglish.pdf]

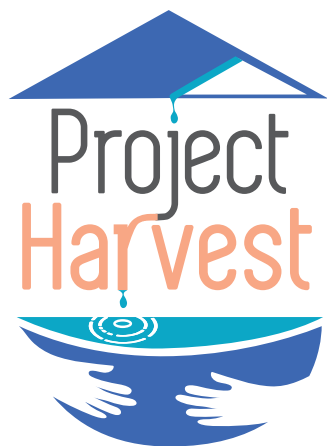

**WANT TO LEARN MORE ABOUT YOUR  
HARVESTED WATER, SOIL, & PLANT DATA?**

**MARK YOUR CALENDARS FOR STEP 1 OF  
PROJECT HARVEST!**

**Dewey - Humboldt, AZ Training**

**August 12-13, 2017  
8:00 - 5:00 PM**

**Humboldt Elementary School, Room #7  
2750 Corral St, Humboldt, AZ 86329**

**Step 1:** Learn about climate change, health, and environmental quality. Learn how to install a water harvesting system, and be trained in how to collect harvested water, soil, and/or vegetable samples from your garden for environmental analysis.

- Meet others in your community who are interested in environmental and food quality.

**For more information, please contact:**  
Mónica Ramírez-Andreotta, PhD  
mdramire@email.arizona.edu  
520-621-0091
