# Supplementary material for: Increasing Environmental Health Literacy through Contextual Learning in Communities at Risk
Source: Int J Environ Res Public Health. 2018 Oct 9;15(10):2203. doi: 10.3390/ijerph15102203 (PMC6210322; doi:10.3390/ijerph15102203)
Supplement: Supplementary file 1 [file ijerph-15-02203-s001.zip › S1_RecruitmentTucsonSpanish.pdf]

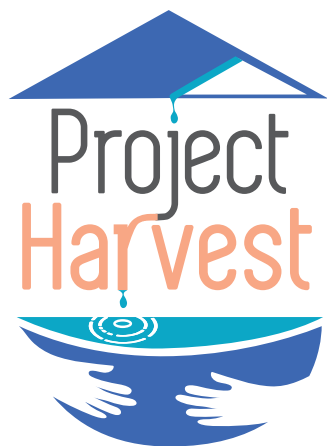

¿QUIERE SABER MÁS SOBRE LOS DATOS DEL AGUA QUE RECOLECTA. EL SUELO. Y LAS PLANTAS?

MARQUE SU CALENDARIO PARA TOMAR EL PRIMER PASO DE "PROJECT HARVEST"

Entrenamiento en Tucson, AZ

22-26 de Mayo del 2017  
8:30 - 12:30 PM

Tucson City Council Office Ward 6,  
3202 E 1st St, Tucson, AZ 85716

**Step 1:** Aprenda como instalar un sistema de recolección de agua de lluvia y reciba entrenamiento de como tomar muestras de agua recolectada, suelo y/o vegetales de sus jardines para análisis ambientales (análisis microbianos, metales y compuestos orgánicos). Conozca a otros en su comunidad que estén interesados en la calidad del medio ambiente y de los alimentos.

**Para obtener más información, favor de ponerse en contacto con:**

Mónica Ramírez-Andreotta, PhD  
mdramire@email.arizona.edu  
520-621-0091

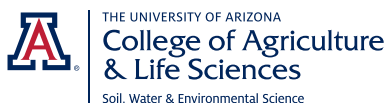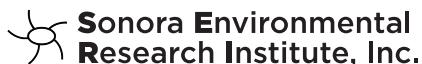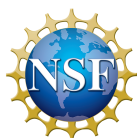

This material is based upon work supported by the National Science Foundation under Grant No. DRL-1612554. Any opinions, findings, and conclusions or recommendations expressed in this material are those of the author(s) and do not necessarily reflect the views of the National Science Foundation.

Visita nuestro sitio web para registrarse:  
<http://projectharvest.arizona.edu/>
