# Supplementary material for: Increasing Environmental Health Literacy through Contextual Learning in Communities at Risk
Source: Int J Environ Res Public Health. 2018 Oct 9;15(10):2203. doi: 10.3390/ijerph15102203 (PMC6210322; doi:10.3390/ijerph15102203)
Supplement: Supplementary file 1 [file ijerph-15-02203-s001.zip › S2_Training Agendas.pdf]

## Appendix B

### Tucson 5-day Training Agenda

|               | May 22 - Monday                                                                         | May 23 - Tuesday                                                                      | May 24 - Wednesday                                                                                              | May 25 - Thursday                                                                     | May 26 - Friday                                                                                                            |
|---------------|-----------------------------------------------------------------------------------------|---------------------------------------------------------------------------------------|-----------------------------------------------------------------------------------------------------------------|---------------------------------------------------------------------------------------|----------------------------------------------------------------------------------------------------------------------------|
| 8:30 – 8:40   | <b>Welcome!</b>                                                                         |                                                                                       |                                                                                                                 |                                                                                       |                                                                                                                            |
| 8:40-9:00     | <b>Pre-Survey</b>                                                                       | <b>Questions and Reflections</b>                                                      |                                                                                                                 |                                                                                       |                                                                                                                            |
| 9:00 - 10:30  | <b>Introduction to Project Harvest and Climate Change</b><br>- Monica Ramirez-Andreotta | <b>Energy: Consumption, Conservation and Efficiency</b><br>- Monica Ramirez-Andreotta | <b>Higher Temperatures, Extreme Heat Events, and Effects on Air Quality</b> - Eduardo Saez                      | <b>Microbiology: Water, Soil, and Food Quality</b><br>- Aminata Kilungo & Jean McLain | <b>Rainwater Harvesting &amp; Sampling Protocols at Nottingham Community Garden, 2660 N Alvernon Way, Tucson, AZ 85712</b> |
| 10:30-10:40   | BREAK                                                                                   | BREAK                                                                                 | BREAK                                                                                                           | BREAK                                                                                 |                                                                                                                            |
| 10:40 - 12:20 | <b>Introduction to Rainwater Harvesting</b> - Flor Morales                              | <b>Chemistry: Organic Compounds and Water Quality</b> - Leif Abrell                   | <b>Chemistry: Inorganic pollutants, Water, soil, and Plant Quality</b><br>- Monica Ramirez-Andreotta & Rob Root | <b>Introduction to Sampling Protocols</b>                                             |                                                                                                                            |
| 12:20-12:30   | Summary of the Day                                                                      | Summary of the Day                                                                    | Summary of the Day                                                                                              | Summary of the Day                                                                    | Closing & Post-Survey                                                                                                      |

### Globe-Miami 5-day Training Agenda

|              | June 12 Monday                                                                          | June 13 Tuesday                                                                            | June 14 Wednesday                                                                    | June 15 Thursday                                                            | June 16 Friday                                                        |
|--------------|-----------------------------------------------------------------------------------------|--------------------------------------------------------------------------------------------|--------------------------------------------------------------------------------------|-----------------------------------------------------------------------------|-----------------------------------------------------------------------|
| 8:30 – 8:40  | <b>Welcome!</b>                                                                         |                                                                                            |                                                                                      |                                                                             |                                                                       |
| 8:40-9:00    | <b>Pre-Survey</b>                                                                       | <b>Questions and Reflections</b>                                                           |                                                                                      |                                                                             |                                                                       |
| 9:00 - 10:30 | <b>Introduction to Project Harvest and Climate Change</b><br>- Monica Ramirez-Andreotta | <b>Higher Temperatures, Extreme Heat Events, and Effects on Air Quality</b> - Eduardo Saez | <b>Microbiology: Water, Soil, and Food Quality</b> - Aminata Kilungo and Jean McLain | <b>Energy: Consumption, Conservation and Efficiency</b><br>- Janick Artiola | <b>Rainwater Harvesting &amp; Sampling Protocols at Bullion Plaza</b> |

|                      |                                                            |                                                                                                      |                                                                     |                                           |                                                                                |
|----------------------|------------------------------------------------------------|------------------------------------------------------------------------------------------------------|---------------------------------------------------------------------|-------------------------------------------|--------------------------------------------------------------------------------|
| <b>10:30-10:40</b>   | BREAK                                                      | BREAK                                                                                                | BREAK                                                               | BREAK                                     | <b>Cultural Center &amp; Museum,</b><br>150 N Plaza Circle,<br>Miami, AZ 85539 |
| <b>10:40 - 12:20</b> | <b>Introduction to Rainwater Harvesting</b> - Flor Morales | <b>Chemistry: Inorganic pollutants, Water, soil, and plant quality</b><br>- Monica Ramirez-Andreotta | <b>Chemistry: Organic Compounds and Water Quality</b> - Leif Abrell | <b>Introduction to Sampling Protocols</b> |                                                                                |
| <b>12:20-12:30</b>   | Summary of the Day                                         | Summary of the Day                                                                                   | Summary of the Day                                                  | Summary of the Day                        | Closing & Post-Survey                                                          |

#### Hayden-Winkleman 3-day Training Agenda

| July 25 - Tuesday   |                                                                                                           |
|---------------------|-----------------------------------------------------------------------------------------------------------|
| 8:30 - 8:40         | <b>Welcome</b>                                                                                            |
| 8:45 - 9:30         | Pre-Survey                                                                                                |
| 9:30 - 11:00        | <b>Introduction to Project Harvest and Climate Change</b><br>- Monica Ramirez                             |
| 11:00 - 11:10       | <i>Break</i>                                                                                              |
| 11:10 - 12:30       | <b>Introduction to Rainwater Harvesting</b> - Flor Sandoval                                               |
| 12:30 - 1:00        | <i>Lunch</i>                                                                                              |
| 1:00 - 2:15         | <b>Chemistry: Inorganic Pollutants, and Water, Soil, and Plant Quality</b><br>- Monica Ramirez & Rob Root |
| 2:15 - 2:50         |                                                                                                           |
| 2:50 - 3:00         | Summary of the Day                                                                                        |
| July 26 - Wednesday |                                                                                                           |
| 8:30 - 8:40         | <b>Questions and Reflections</b>                                                                          |
| 8:45 – 10:30        | <b>Effects of Global Climate Change: Temperature, Weather, and Air Pollution</b> - Eduardo Saez           |
| 10:30 – 10:45       | <i>Break</i>                                                                                              |
| 10:45 -12:30        | <b>Microbiology: Water, Soil, and Food Quality</b> - Jean McLain                                          |
| 12:30 - 1:00        | <i>Lunch</i>                                                                                              |
| 1:00 - 2:50         | <b>Sampling Protocols: Inorganic and Microbial contaminants</b>                                           |
| 2:50 - 3:00         | Summary of the Day                                                                                        |
| July 27 - Thursday  |                                                                                                           |

|               |                                                                                                |
|---------------|------------------------------------------------------------------------------------------------|
| 8:30 - 8:40   | <b>Questions and Reflections</b>                                                               |
| 8:45 – 10:30  | <b>Climate Change and Energy: Consumption, Conservation and Efficiency –</b><br>Janick Artiola |
| 10:30 – 10:45 | <i>Break</i>                                                                                   |
| 10:45 -12:30  | <b>Chemistry: Organic Compounds and Water Quality</b> - Leif Abrell                            |
| 12:30 - 1:00  | <i>Lunch</i>                                                                                   |
| 1:00 - 2:00   | <b>Sampling Protocols: Organic Compounds</b>                                                   |
| 2:00 - 3:00   | Post- Survey                                                                                   |

#### Dewey-Humboldt 2-day Training Agenda

| August 12 - Saturday |                                                                                                           |
|----------------------|-----------------------------------------------------------------------------------------------------------|
| <b>8:00 - 8:10</b>   | <b>Welcome!</b>                                                                                           |
| <b>8:10 - 9:00</b>   | Pre-Survey                                                                                                |
| <b>9:00 - 10:30</b>  | <b>Introduction to Project Harvest and Climate Change</b><br>- Monica Ramirez                             |
| <b>10:30 - 10:40</b> | <i>Break</i>                                                                                              |
| <b>10:40 - 12:00</b> | <b>Introduction to Rainwater Harvesting</b><br>- Flor Sandoval                                            |
| <b>12:00 - 12:30</b> | <i>Lunch</i>                                                                                              |
| <b>12:30 - 2:00</b>  | <b>Effects of Global Climate Change: Temperature, Weather, and Air Pollution</b> -<br>Eduardo Saez        |
| <b>2:00-4:00</b>     | <b>Chemistry: Inorganic Pollutants, and Water, Soil, and Plant Quality</b><br>- Monica Ramirez & Rob Root |
| <b>4:00 - 4:50</b>   | <b>Sampling Protocols: Inorganic</b>                                                                      |
| <b>4:50 - 5:00</b>   | <i>Summary of the Day</i>                                                                                 |
| August 13 - Sunday   |                                                                                                           |
| <b>8:00 - 8:15</b>   | Questions and Reflections                                                                                 |
| <b>8:15 - 9:45</b>   | <b>Chemistry: Organic Compounds and Water Quality</b><br>- Leif Abrell                                    |
| <b>9:45-10:00</b>    | <i>Break</i>                                                                                              |
| <b>10:00 - 11:00</b> | <b>Sampling Protocol: Organic</b>                                                                         |
| <b>11:00 - 12:30</b> | <b>Climate Change and Energy: Consumption, Conservation and Efficiency</b><br>- Janick Artiola            |
| <b>12:30 - 1:00</b>  | <i>Lunch</i>                                                                                              |
| <b>1:00 - 2:30</b>   | <b>Microbiology: Water, Soil, and Food Quality</b><br>- Aminata Kilungo                                   |

|                    |                                     |
|--------------------|-------------------------------------|
| <b>2:30 - 4:00</b> | <b>Sampling Protocol: Microbial</b> |
| <b>4:00 - 5:00</b> | Post-Survey                         |
